# Supplementary material for: Free Fatty Acids from Cow Urine DMSO Fraction Induce Cell Death in Breast Cancer Cells without Affecting Normal GMSCs
Source: MDPI journal article supplement (doi:10.3390/biomedicines11030889), 2023-03-13
Supplement: s1 [file s1]

## Supplementary Data

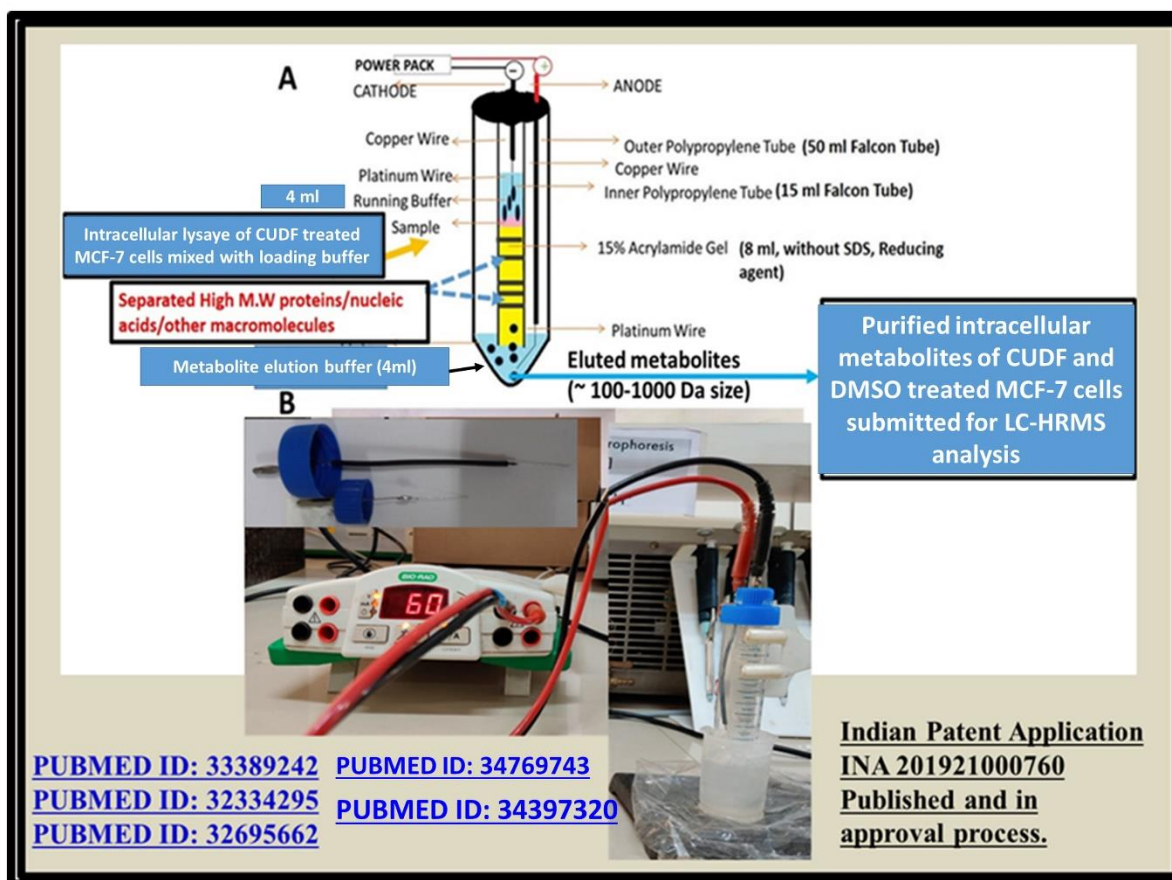

**Figure S1.** A flow diagram of novel and in-house developed vertical tube gel electrophoresis (VTGE) system for the purification of intracellular metabolites.

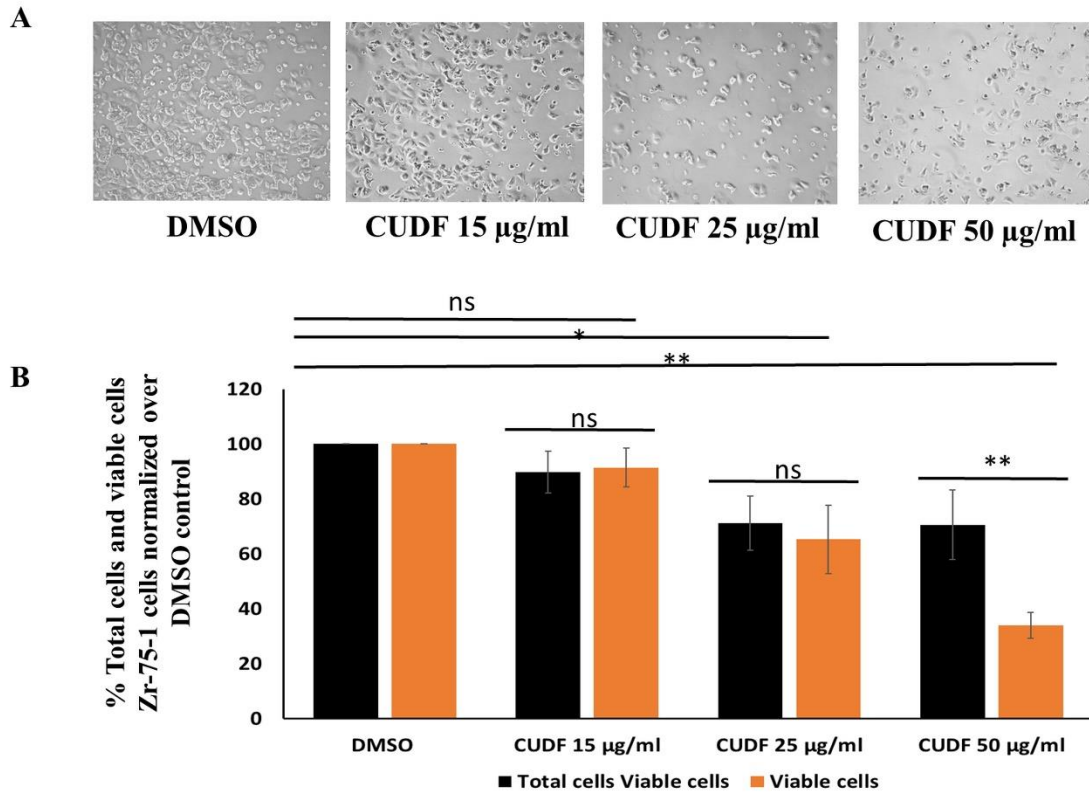

**Figure S2.** Cow urine DMSO fraction (CUDF) shows significant reduction in the viability of ZR-75-1 breast cancer cells.

(A) ZR-75-1 cancer cells were treated by DMSO and varied concentration of CUDF (15 µg/ml, 25 µg/ml and 50 µg/ml) for 72 hr. Routine microscopy was performed at 100X to observe the cell number and cellular morphology. (B) MCF-7 cancer cells were treated by DMSO and CUDF (50 µg/ml) for 72 hr. Percentage total and cell viability of MCF-7 cancer cells estimated by Trypan blue dye exclusion assay and normalized over DMSO control. Data are represented as mean  $\pm$  SD. Each experiment was conducted independently three times. The bar graph without an asterisk denotes that there is no significant difference compared to DMSO control. \* Significantly different from DMSO control at the P-value  $\leq 0.05$ . \*\* Significantly different from DMSO control at P-value  $\leq 0.01$ . \*\*\* Significantly different from DMSO control at P-value  $\leq 0.001$ .

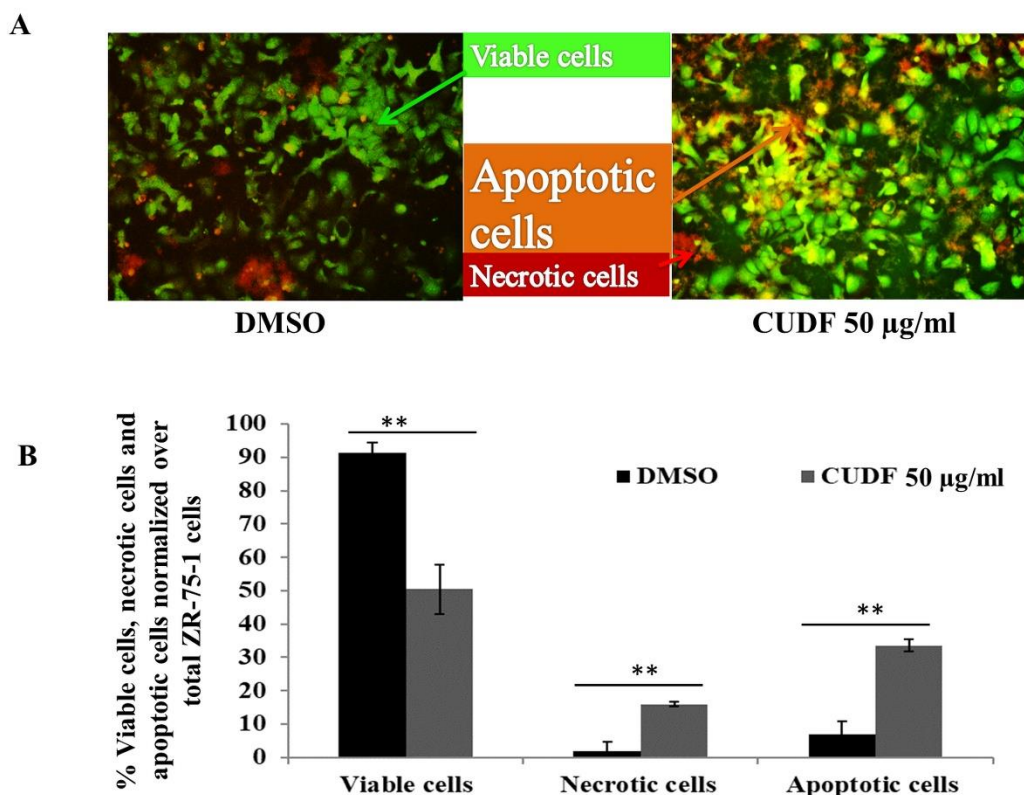

**Figure S3.** Cow urine DMSO fraction (CUDF) induces apoptosis in ZR-75-1 cancer cells by dual acridine orange (AO)/Ethidium bromide (EB) staining.

(A) ZR-75-1 breast cancer cells were treated by DMSO and CUDF (50 µg/ml) for 72 hr. At the end of incubation, cells were harvested and processed for acridine orange (AO)/Ethidium bromide (EB) staining as described under “experimental procedure”. The fluorescent microscopy images were captured at 40X magnification. (B) Percentage viable cells, necrotic cells and apoptotic cells in ZR-75-1 cancer cells were estimated by counting of cells differentially stained with AO/EB. Green color (normal cells). Yellow-green fluorescence by acridine orange (AO) Early apoptotic cells): Crescent or granular group of cells shows (Late apoptotic cells): EB stained orange fluorescence (Necrotic cells). Data are represented as mean  $\pm$  SD. Each experiment was conducted independently three times. The bar graph without an asterisk denotes that there is no significant difference compared to DMSO control. \* Significantly different from DMSO control at the P-value  $\leq 0.05$ . \*\* Significantly different from DMSO control at P-value  $\leq 0.001$ . \*\*\* Significantly different from DMSO control at P-value  $\leq 0.001$ .

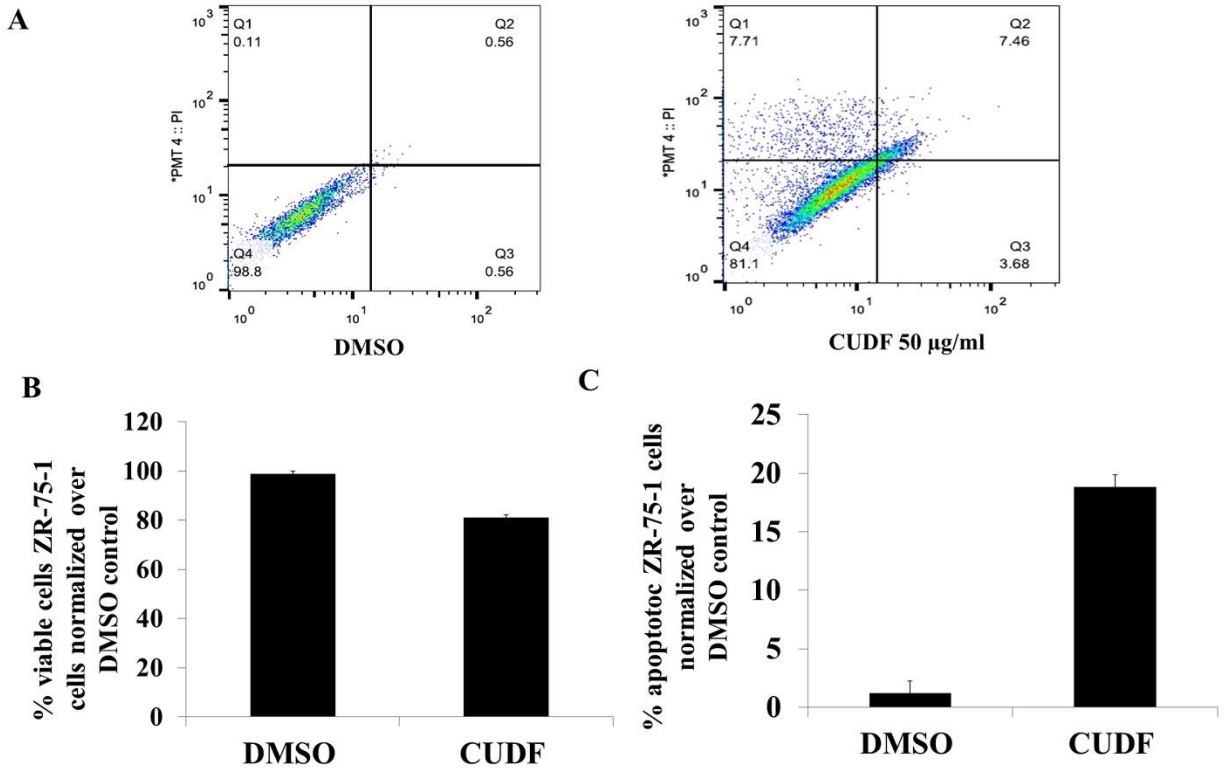

**Figure S4.** Cow urine DMSO fraction (CUDF) treatment upon ZR-75-1 breast cancer cells promotes apoptotic cell death.

(A) ZR-75-1 cancer cells were treated by DMSO and CUDF (50 µg/ml) for 72 hr. At the end of treatment, harvested ZR-75-1 cells were subjected to PI/annexin V staining and analyzed by flow cytometer. The scatter plots of cells were stained with PI and Annexin V conjugated with FITC for the analysis of apoptotic cells in ZR-75-1. (B) ZR-75-1 cancer cells were treated by DMSO and CUDF (50 µg/ml) for 72 hr. At the end of treatment, harvested ZR-75-1 cells were subjected to PI/annexin V staining and analyzed by flow cytometer. Percentage of cell viability was calculated from number of PI and Annexin V negative cells in the quadrant 4 of scattered plot divided by total number of cell. (C) ZR-75-1 cancer cells were treated by DMSO and CUDF (50 µg/ml) for 72 hr. At the end of treatment, harvested MCF-7 cells were subjected to PI/annexin V staining and analyzed by flow cytometer. Percentage of apoptotic cell was calculated from number of cells in the quadrant 3 and 4 stained with Annexin V and PI divided by the total number of cell. Data are represented as mean  $\pm$  SD. Each experiment was conducted independently three times. The bar graph without an asterisk denotes that there is no significant difference compared to DMSO control. \* Significantly different from DMSO control at the P-value  $\leq$  0.05. \*\* Significantly different from DMSO control at P-value  $\leq$  0.001. \*\*\* Significantly different from DMSO control at P-value  $\leq$  0.001.

| Compound Label        | Name                         | m/z      | RT     | Algorithm  | Mass     |
|-----------------------|------------------------------|----------|--------|------------|----------|
| Tetracosanedioic acid | <b>Tetracosanedioic acid</b> | 399.3537 | 14.871 | Auto MS/MS | 398.3465 |

MS Spectrum

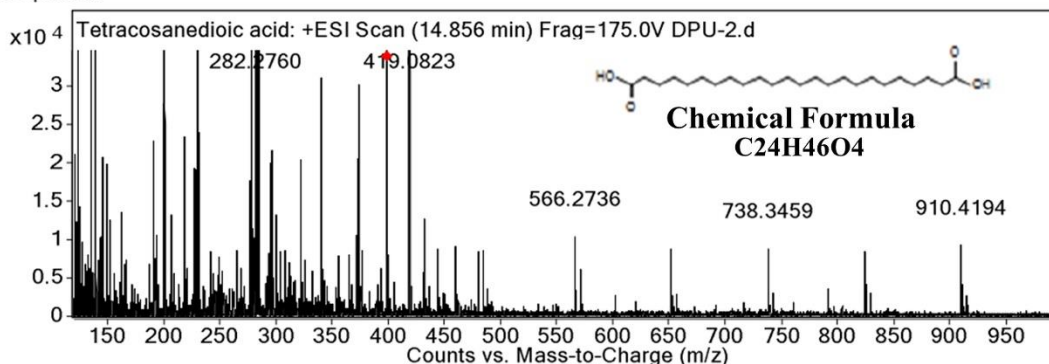

MS Spectrum Peak List

| m/z      | z | Abund     |
|----------|---|-----------|
| 124.0851 |   | 47872.12  |
| 136.0623 |   | 54191.03  |
| 139.0482 |   | 51758.3   |
| 200.0918 |   | 56061.94  |
| 230.1376 |   | 39087     |
| 282.276  | 1 | 319787.27 |
| 283.2793 | 1 | 71075.13  |
| 284.3276 | 1 | 94321.62  |
| 418.0749 |   | 57135.61  |
| 419.0823 | 1 | 90879.39  |

**Figure. S5.** LC-HRMS fragmentation mass ion spectra of tetracosanedioic acid  
MCF-7 cancer cells were treated with CUDF. Intracellular lysate of MCF-7 cells were prepared by hypotonically and processed for the purification of metabolite by VTGE. Then VTGE purified intracellular metabolite was submitted to LC-HRMS. A detailed procedure on LC-HRMS analysis is given in the experimental procedure.

| Compound Label        | Name                         | <i>m/z</i> | RT     | Algorithm  | Mass     |
|-----------------------|------------------------------|------------|--------|------------|----------|
| 13(Z)-Docosenoic acid | <b>13(Z)-Docosenoic acid</b> | 343.2923   | 10.898 | Auto MS/MS | 338.3135 |

MS Spectrum

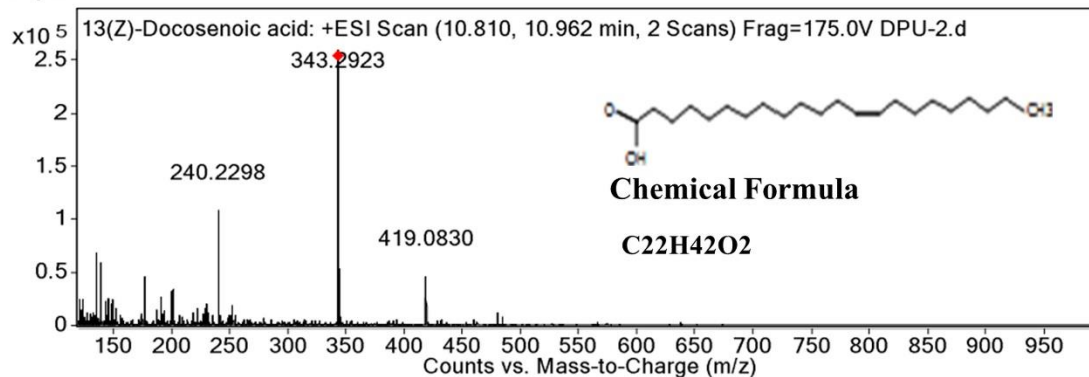

MS Spectrum Peak List

| <i>m/z</i> | <i>z</i> | Abund     |
|------------|----------|-----------|
| 136.0625   | 2        | 69621.88  |
| 139.0483   | 1        | 62810.35  |
| 177.052    |          | 28881.79  |
| 177.0672   | 1        | 45553.57  |
| 191.0125   |          | 29525.33  |
| 201.0996   | 1        | 34687.09  |
| 240.2298   | 1        | 108093.58 |
| 343.2923   | 1        | 267578.71 |
| 344.2952   | 1        | 54010.93  |
| 419.083    | 1        | 47718.38  |

**Figure. S6.** LC-HRMS fragmentation mass ion spectra of 13(Z)-Docosenoic acid.

MCF-7 cancer cells were treated with CUDF. Intracellular lysate of MCF-7 cells were prepared by hypotonically and processed for the purification of metabolite by VTGE. Then VTGE purified intracellular metabolite was submitted to LC-HRMS. A detailed procedure on LC-HRMS analysis is given in the experimental procedure.



| Compound Label | Name          | m/z      | RT     | Algorithm  | Mass     |
|----------------|---------------|----------|--------|------------|----------|
| Nervonic acid  | Nervonic acid | 371.3226 | 12.835 | Auto MS/MS | 366.3439 |

MS Spectrum

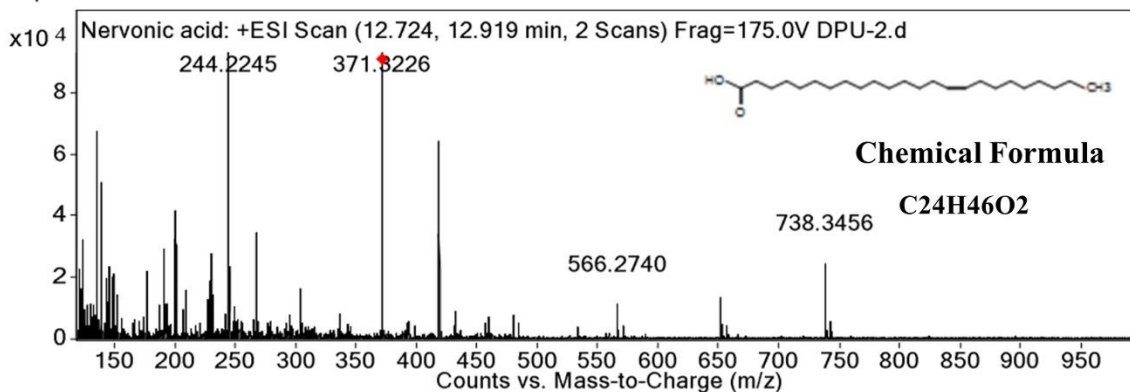

MS Spectrum Peak List

| m/z      | z | Abund     |
|----------|---|-----------|
| 124.0851 |   | 33164.58  |
| 136.0622 | 2 | 68072.22  |
| 139.0482 | 1 | 53963.69  |
| 191.012  |   | 30698.31  |
| 200.0919 |   | 42706.18  |
| 201.099  |   | 33664.11  |
| 244.2245 | 1 | 139475.56 |
| 268.2602 | 1 | 35868.97  |
| 371.3226 | 1 | 93522.18  |
| 419.0823 | 1 | 65773.71  |

**Figure. S7.** LC-HRMS fragmentation mass ion spectra of nervonic acid.

MCF-7 cancer cells were treated with CUDF. Intracellular lysate of MCF-7 cells were prepared by hypotonically and processed for the purification of metabolite by VTGE. Then VTGE purified intracellular metabolite was submitted to LC-HRMS. A detailed procedure on LC-HRMS analysis is given in the experimental procedure.

| Compound Label             | Name                              | <i>m/z</i> | RT     | Algorithm  | Mass     |
|----------------------------|-----------------------------------|------------|--------|------------|----------|
| 3-hydroxy-tridecanoic acid | <b>3-hydroxy-tridecanoic acid</b> | 235.1664   | 14.322 | Auto MS/MS | 230.1877 |

MS Spectrum

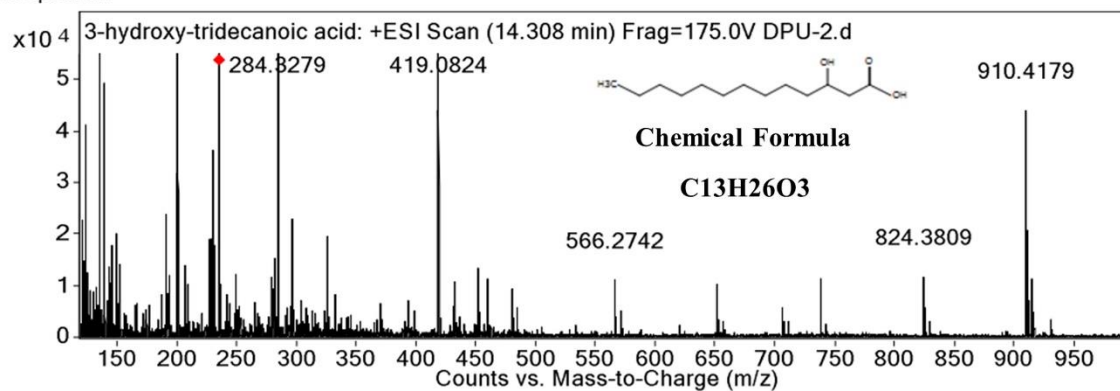

MS Spectrum Peak List

| <i>m/z</i> | <i>z</i> | Abund    |
|------------|----------|----------|
| 124.085    | 1        | 42940.22 |
| 136.0623   |          | 65038.8  |
| 139.048    |          | 51784.62 |
| 200.0918   |          | 56141.2  |
| 230.1371   |          | 36396.9  |
| 235.1664   | 1        | 55267.61 |
| 284.3279   | 1        | 68775.03 |
| 418.075    |          | 55309.28 |
| 419.0824   | 1        | 83885.64 |

**Figure S8.** LC-HRMS fragmentation mass ion spectra of 3-hydroxytridecanoic acid. MCF-7 cancer cells were treated with CUDF. Intracellular lysate of MCF-7 cells were prepared by hypotonically and processed for the purification of metabolite by VTGE. Then VTGE purified intracellular metabolite was submitted to LC-HRMS. A detailed procedure on LC-HRMS analysis is given in the experimental procedure.



|                      |                             |          |      |            |         |
|----------------------|-----------------------------|----------|------|------------|---------|
| 3-Hydroxycapric acid | <b>3-Hydroxycapric acid</b> | 193.1158 | 0.89 | Auto MS/MS | 188.137 |
|----------------------|-----------------------------|----------|------|------------|---------|

MS Spectrum

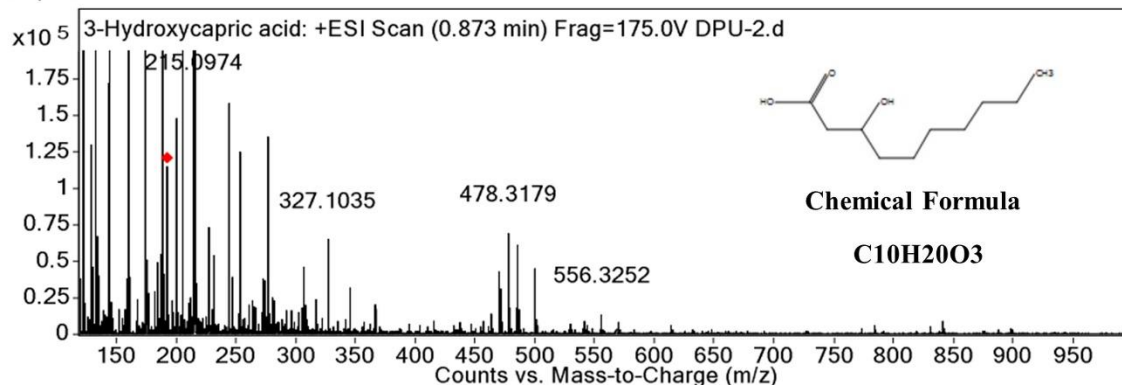

MS Spectrum Peak List

| <i>m/z</i> | <i>z</i> | Abund      |
|------------|----------|------------|
| 122.0793   | 1        | 3214158.66 |
| 133.1319   | 1        | 375042.46  |
| 144.0609   | 1        | 2062290.97 |
| 160.1423   | 1        | 416120.43  |
| 174.1576   | 1        | 553190.43  |
| 188.1732   | 1        | 200743.49  |
| 206.0311   |          | 200210.84  |
| 215.0974   | 1        | 2920364.33 |
| 216.101    | 1        | 238359.62  |
| 244.1238   | 1        | 172911.19  |

**Figure S9.** LC-HRMS fragmentation mass ion spectra of 3-hydroxycapric acid.

MCF-7 cancer cells were treated with CUDF. Intracellular lysate of MCF-7 cells were prepared by hypotonically and processed for the purification of metabolite by VTGE. Then VTGE purified intracellular metabolite was submitted to LC-HRMS. A detailed procedure on LC-HRMS analysis is given in the experimental procedure.

Tetracosanedioic acid

| A | Liver Toxicity |      | Metabolism |                    |     |     |     |     | Membrane Transporters |     |            | Others    |            |     |     |             |       |
|---|----------------|------|------------|--------------------|-----|-----|-----|-----|-----------------------|-----|------------|-----------|------------|-----|-----|-------------|-------|
|   | Quer           | DILI | Cyto-toxic | Cyp Inhibitors for |     |     |     |     |                       | BBB | P-gp Inhib | P-gp Subs | hERG Block | MMP | AME | MRTD (mg/c) |       |
|   |                |      |            | HLM                | 1A2 | 3A4 | 2D6 | 2C9 | 2C19                  |     |            |           |            |     |     |             |       |
|   |                | No   | No         | Yes                | No  | No  | No  | No  | No                    | No  | No         | No        | No         | No  | No  | No          | 15601 |

Trichostatin A (TSA)

| B | Liver Toxicity                                                                    |      | Metabolism |                    |     |     |     |     | Membrane Transporters |     |            | Others    |            |     |     |             |
|---|-----------------------------------------------------------------------------------|------|------------|--------------------|-----|-----|-----|-----|-----------------------|-----|------------|-----------|------------|-----|-----|-------------|
|   | Quer                                                                              | DILI | Cyto-toxic | Cyp Inhibitors for |     |     |     |     |                       | BBB | P-gp Inhib | P-gp Subs | hERG Block | MMP | AME | MRTD (mg/c) |
|   |                                                                                   |      |            | HLM                | 1A2 | 3A4 | 2D6 | 2C9 | 2C19                  |     |            |           |            |     |     |             |
|   |  | No   | No         | Yes                | No  | No  | No  | No  | No                    | Yes | Yes        | Yes       | No         | Yes | Yes | 150         |

**Figure S10** Intracellular FFA tetracosanedioic acid is predicted as a safer drug candidate over Trichostatin A (TSA), a known inhibitor of HDAC by vNN-ADMET.

Here, intracellular FFA tetracosanedioic acid and Trichostatin A (TSA) were submitted to vNN-ADMET server for the prediction of carcinogenicity, liver toxicity, substrate of P-gp and recommended therapeutic dose (RMTD).

**Table S1:** Molecular docking based screening of selected FFAs against several pro-tumor proteins. These selected FFAs are detected in the intracellular compartment of MCF-7 breast cancer cells treated with FFAs enriched CUDF.

| Name of ligands                                                                                      | Proteins and their PDB IDs                  | Binding energy (-kcal/mol) | RMSD value l.b. | RMSD value u.b |
|------------------------------------------------------------------------------------------------------|---------------------------------------------|----------------------------|-----------------|----------------|
| <b>13-Docosenoic acid</b><br>(C <sub>22</sub> H <sub>42</sub> O <sub>2</sub> )<br>(PubChem CID 8216) | 2AST (Skp1-Skp2-Cks1 in complex with a p27) | -4.0                       | 0.000           | 0.000          |
|                                                                                                      | 5L2W (CDK2/Cyclin E)                        | -4.8                       | 0.000           | 0.000          |
|                                                                                                      | 2W96 (CDK4 in complex with a D-type cyclin) | -5.0                       | 0.000           | 0.000          |
|                                                                                                      | 4JSN (mTORdeltaN-mLST8 complex)             | -4.5                       | 0.000           | 0.000          |
|                                                                                                      | 1FOS (C-FOS:C-JUN:DNA)                      | -5.3                       | 0.000           | 0.000          |
|                                                                                                      | 1LFD (RAS PROTEIN)                          | -4.0                       | 0.000           | 0.000          |
|                                                                                                      | 4WXX (DNMT1(351-1600))                      | -4.4                       | 0.000           | 0.000          |
|                                                                                                      | 5A9D (Extracellular domain of PepT1)        | -4.8                       | 0.000           | 0.000          |
|                                                                                                      | 5ZTY (G protein coupled receptor)           | -3.1                       | 0.000           | 0.000          |
|                                                                                                      | 6OS9 (Human Neurotensin Receptor (C state)) | -4.4                       | 0.000           | 0.000          |
|                                                                                                      | 4DAJ (Muscarinic Acetylcholine Receptor)    | -4.2                       | 0.000           | 0.000          |
|                                                                                                      | 1C3R (HDAC Homolog Complexed)               | -7.5                       | 0.000           | 0.000          |
|                                                                                                      | 2AST (Skp1-Skp2-Cks1 in complex with a p27) | -3.9                       | 0.000           | 0.000          |
|                                                                                                      | 5L2W (CDK2/Cyclin E)                        | -4.2                       | 0.000           | 0.000          |
|                                                                                                      | 2W96 (CDK4 in complex with a D-type cyclin) | -4.3                       | 0.000           | 0.000          |
|                                                                                                      | 4JSN (mTORdeltaN-mLST8 complex)             | -4.6                       | 0.000           | 0.000          |

|                                                                                                           |                                             |      |       |       |
|-----------------------------------------------------------------------------------------------------------|---------------------------------------------|------|-------|-------|
| Tetracosanedioic acid (C <sub>24</sub> H <sub>46</sub> O <sub>4</sub> )<br><br>(PubChem CID2724554)       | 1FOS (C-FOS:C-JUN:DNA)                      | -5.5 | 0.000 | 0.000 |
|                                                                                                           | 1LFD (RAS PROTEIN)                          | -4.5 | 0.000 | 0.000 |
|                                                                                                           | 4WXX (DNMT1(351-1600)                       | -4.1 | 0.000 | 0.000 |
|                                                                                                           | 5A9D (Extracellular domain of PepT1)        | -3.9 | 0.000 | 0.000 |
|                                                                                                           | 5ZTY (G protein coupled receptor)           | -3.4 | 0.000 | 0.000 |
|                                                                                                           | 6OS9 (Human Neurotensin Receptor (C state)  | -4.2 | 0.000 | 0.000 |
|                                                                                                           | 4DAJ (Muscarinic Acetylcholine Receptor)    | -4.5 | 0.000 | 0.000 |
|                                                                                                           | 1C3R (HDAC Homolog Complexed)               | -7.0 | 0.000 | 0.000 |
| 3-Hydroxytridecanoic acid (C <sub>13</sub> H <sub>26</sub> O <sub>3</sub> )<br><br>(PubChem CID: 5312749) | 2AST (Skp1-Skp2-Cks1 in complex with a p27) | -4.0 | 0.000 | 0.000 |
|                                                                                                           | 5L2W (CDK2/Cyclin E)                        | -4.0 | 0.000 | 0.000 |
|                                                                                                           | 2W96 (CDK4 in complex with a D-type cyclin) | -4.8 | 0.000 | 0.000 |
|                                                                                                           | 4JSN (mTORdeltaN-mLST8 complex)             | -5.0 | 0.000 | 0.000 |
|                                                                                                           | 1FOS (C-FOS:C-JUN:DNA)                      | -4.5 | 0.000 | 0.000 |
|                                                                                                           | 1LFD (RAS PROTEIN)                          | -5.3 | 0.000 | 0.000 |
|                                                                                                           | 4WXX (DNMT1(351-1600)                       | -4.0 | 0.000 | 0.000 |
|                                                                                                           | 5A9D (Extracellular domain of PepT1)        | -4.4 | 0.000 | 0.000 |
|                                                                                                           | 5ZTY (G protein coupled receptor)           | -4.8 | 0.000 | 0.000 |
|                                                                                                           | 6OS9 (Human Neurotensin Receptor (C state)  | -3.5 | 0.000 | 0.000 |

|                                                                                                     |                                             |      |       |       |
|-----------------------------------------------------------------------------------------------------|---------------------------------------------|------|-------|-------|
|                                                                                                     | 4DAJ (Muscarinic Acetylcholine Receptor)    | -4.4 | 0.000 | 0.000 |
|                                                                                                     | 1C3R (HDAC Homolog Complexed)               | -6.6 | 0.000 | 0.000 |
| <b>Nervonic acid</b><br><b>(C<sub>24</sub>H<sub>46</sub>O<sub>2</sub>)</b><br>(PubChem CID 5281120) | 5L2W (CDK2/Cyclin E)                        | -4.4 | 0.000 | 0.000 |
|                                                                                                     | 2W96 (CDK4 in complex with a D-type cyclin) | -4.3 | 0.000 | 0.000 |
|                                                                                                     | 4JSN (mTORdeltaN-mLST8 complex)             | -4.6 | 0.000 | 0.000 |
|                                                                                                     | 1FOS (C-FOS:C-JUN:DNA)                      | -4.9 | 0.000 | 0.000 |
|                                                                                                     | 1LFD (RAS PROTEIN)                          | -4.9 | 0.000 | 0.000 |
|                                                                                                     | 4WXX (DNMT1(351-1600))                      | -5.0 | 0.000 | 0.000 |
|                                                                                                     | 5A9D (Extracellular domain of PepT1)        | -4.4 | 0.000 | 0.000 |
|                                                                                                     | 5ZTY (G protein coupled receptor)           | -3.9 | 0.000 | 0.000 |
|                                                                                                     | 6OS9 (Human Neurotensin Receptor (C state)) | -4.1 | 0.000 | 0.000 |
|                                                                                                     | 4DAJ(muscarinic Acetylcholine Receptor)     | -4.6 | 0.000 | 0.000 |
|                                                                                                     | 1C3R (HDAC Homolog Complexed)               | -6.2 | 0.000 | 0.000 |
|                                                                                                     | 2AST (Skp1-Skp2-Cks1 in complex with a p27) |      | 0.000 | 0.000 |
|                                                                                                     | 1LFD (RAS PROTEIN)                          | -5.6 | 0.000 | 0.000 |
|                                                                                                     | 4WXX (DNMT1(351-1600))                      | -5.1 | 0.000 | 0.000 |
|                                                                                                     | 5A9D (Extracellular domain of PepT1)        | -4.3 | 0.000 | 0.000 |
|                                                                                                     | 5ZTY (G protein coupled receptor)           | -3.5 | 0.000 | 0.000 |

|                                                                                             |                                             |      |       |       |
|---------------------------------------------------------------------------------------------|---------------------------------------------|------|-------|-------|
|                                                                                             | 6OS9 (Human Neurotensin Receptor (C state)  | -3.9 | 0.000 | 0.000 |
|                                                                                             | 4DAJ(muscarinic Acetylcholine Receptor)     | -3.5 | 0.000 | 0.000 |
|                                                                                             | 5TD7 (Histone deacetylase 10)               | -4.2 | 0.000 | 0.000 |
|                                                                                             | 4BKX (HDAC1 complex)                        | -5.2 | 0.000 | 0.000 |
|                                                                                             | 1C3R (HDAC Homolog Complexed)               | -6.5 | 0.000 | 0.000 |
| 3-Hydroxycapric acid (C <sub>10</sub> H <sub>20</sub> O <sub>3</sub> )<br>(PubChemCID26612) | 2AST (Skp1-Skp2-Cks1 in complex with a p27) | -4.9 | 0.000 | 0.000 |
|                                                                                             | 5L2W (CDK2/Cyclin E)                        | -4.5 | 0.000 | 0.000 |
|                                                                                             | 2W96 (CDK4 in complex with a D-type cyclin) | -3.8 | 0.000 | 0.000 |
|                                                                                             | 4JSN (mTORdeltaN-mLST8 complex)             | -4.6 | 0.000 | 0.000 |
|                                                                                             | 1FOS (C-FOS:C-JUN:DNA)                      | -5.6 | 0.000 | 0.000 |
|                                                                                             | 1LFD (RAS PROTEIN)                          | -5.1 | 0.000 | 0.000 |
|                                                                                             | 4WXX (DNMT1(351-1600)                       | -4.3 | 0.000 | 0.000 |
|                                                                                             | 5A9D (Extracellular domain of PepT1)        | -3.5 | 0.000 | 0.000 |
|                                                                                             | 5ZTY (G protein coupled receptor)           | -3.9 | 0.000 | 0.000 |
|                                                                                             | 6OS9 (Human Neurotensin Receptor (C state)  | -3.5 | 0.000 | 0.000 |
|                                                                                             | 4DAJ(Muscarinic Acetylcholine Receptor)     | -4.2 | 0.000 | 0.000 |
|                                                                                             | 1C3R (HDAC Homolog Complexed)               | -6.1 | 0.000 | 0.000 |
